# Supplementary material for: Movable-type printing method to fabricate ternary FeCoNi alloys confined in porous carbon towards oxygen electrocatalysts for rechargeable Zn-air batteries
Source: Royal Society of Chemistry journal article supplement (doi:10.1039/d3nr06287b), 2024-01-01
Supplement: d3nr06287b1.pdf [file d3nr06287b1.pdf]

## Movable type printing method to fabricate ternary FeCoNi alloy confined in porous carbon towards oxygen electrocatalysts for rechargeable Zn-air battery

Xuzi Cong<sup>a,1</sup>, Jigang Wang<sup>a,1</sup>, Yinggang Sun<sup>a</sup>, Gaojin Feng<sup>a</sup>, Qiang Liu<sup>a</sup>, Likai Wang<sup>a,b,\*</sup>

<sup>a</sup> School of Chemistry and Chemical Engineering, Shandong University of Technology, Zibo, Shandong 255049, P. R. China

<sup>b</sup> School of Chemical and Biological Engineering, and Institute of Chemical Process, Seoul National University, Seoul 08826, Republic of Korea.

\* Corresponding authors.

E-mail addresses: [lkwangchem@sdut.edu.cn](mailto:lkwangchem@sdut.edu.cn)

<sup>1</sup> These authors contributed equally to this work.

### Electrochemical Characterizations

The electrochemical measurements were conducted using CHI 760E electrochemical workstation equipped with a standard three-electrode glass cell. The three-electrode consisted of a reference electrode (Ag/AgCl), a counter electrode (graphite rod) and a rotating disk electrode (RDE). For preparation of the working electrode, 2.5 mg of catalyst and 10  $\mu\text{L}$  of Nafion (5 wt%) were dispersed in 1 mL ethanol under sonication for 30 mins to obtain a uniform catalyst ink. Subsequently, 32  $\mu\text{L}$  of the catalyst ink was carefully applied onto the surface of was dripped on the surface of RDE with the loading mass of 400  $\mu\text{g cm}^{-2}$ , while the loading mass of commercial Pt/C was about 200  $\mu\text{g cm}^{-2}$ .

The Koutecky-Levich (K-L) plot was calculated to obtain the number of electrons transferred (n) of oxygen reduction reaction and analyze reaction kinetic, could be expressed as follows:

$$\frac{1}{J} = \frac{1}{J_L} + \frac{1}{J_k} = \frac{1}{B\omega^{1/2}} + \frac{1}{J_K}$$

$$B = 0.62nFC_0D_0^{2/3}v^{-1/6}$$

$$J_K = nFKC_0$$

where  $J$ ,  $J_K$  and  $J_L$  are the measured current density, kinetic and diffusion limiting current densities, respectively;  $\omega$  is the linear rotation speed ( $\text{rpm min}^{-1}$ ) of the disk,  $F$  is the Faradaic constant ( $96485 \text{ C mol}^{-1}$ ),  $C_0$  is the oxygen concentration (solubility) in 0.1 M KOH ( $1.2 \times 10^{-6} \text{ mol cm}^{-3}$ );  $D_0$  is the oxygen diffusion coefficient in 0.1 M KOH ( $1.9 \times 10^{-5} \text{ cm}^2 \text{ s}^{-1}$ ),  $\nu$  is the kinematic viscosity of the 0.1 M KOH ( $1.13 \times 10^{-5} \text{ cm}^2 \text{ s}^{-1}$ ), and  $K$  is the constant of electron transfer rate.

RRDE tests were conducted on the CHI 760E electrochemical analyzer at a rotation speed of 1600 rpm with a potential sweep of  $10 \text{ mV s}^{-1}$ ; the Pt ring potential was set at 1.5 V vs. RHE. The electron transfer number ( $n$ ) and the yield of hydrogen peroxide were obtained based on the following equation:

$$n = 4 \frac{I_d}{I_d + I_r/N}$$

$$H_2O_2\% = 200 \frac{I_r/N}{I_d + I_r/N}$$

where  $I_d$  and  $I_r$  are the disk current and ring current, respectively, and  $N$  is the collection efficiency of the Pt ring ( $N = 0.37$ , as provided by the manufacturer).

## Liquid ZABs

Liquid ZABs were prepared and tested at room temperature. Briefly, a polished zinc foil and 6.0 M KOH filled with 0.2 M  $\text{Zn}(\text{acac})_2$  were used as anode and electrolyte, respectively. The air cathode was assembled with the carbon cloth loaded with FeCoNi-NC catalysts or the mixture of commercial Pt/C+ $\text{RuO}_2$  (Pt/C: $\text{RuO}_2 = 1:1$ ), where the mass loading of catalyst was about  $1 \text{ mg cm}^{-2}$ . Nickel foam was used as current collector.

## Solid ZABs

2 g of PVA was dissolved in 24 ml of water, the mixture was heated to  $95^\circ\text{C}$  and continuously stirred until it turned into a clear glue-like substance. Then 18 M KOH and 0.6 M  $\text{Zn}(\text{acac})_2$  aqueous solution was added to obtain a homogeneous solid-state gel electrolyte, and this electrolyte was stored under  $-18^\circ\text{C}$  for overnight. Flexible ZABs electrode consists of solid electrolyte, a carbon cloth coated by catalyst as air cathode, and a polished zinc foil as the anode.

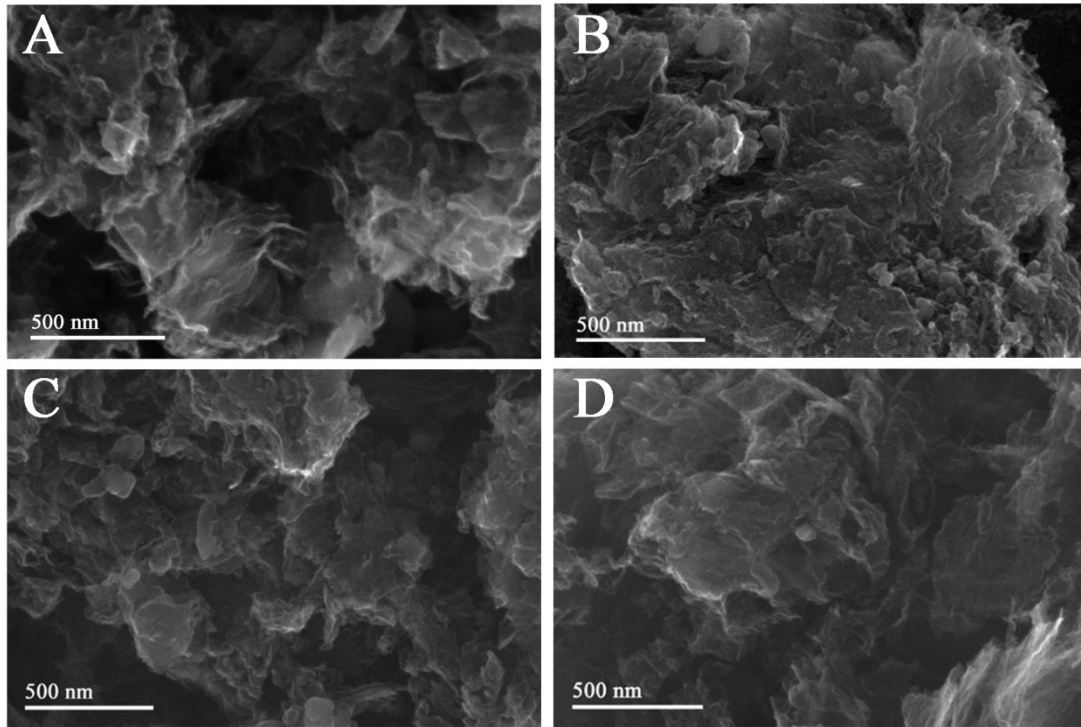

**Figure S1** SEM images of (A) NC, (B) Fe-NC, (C) Co-NC and (D) Ni-NC

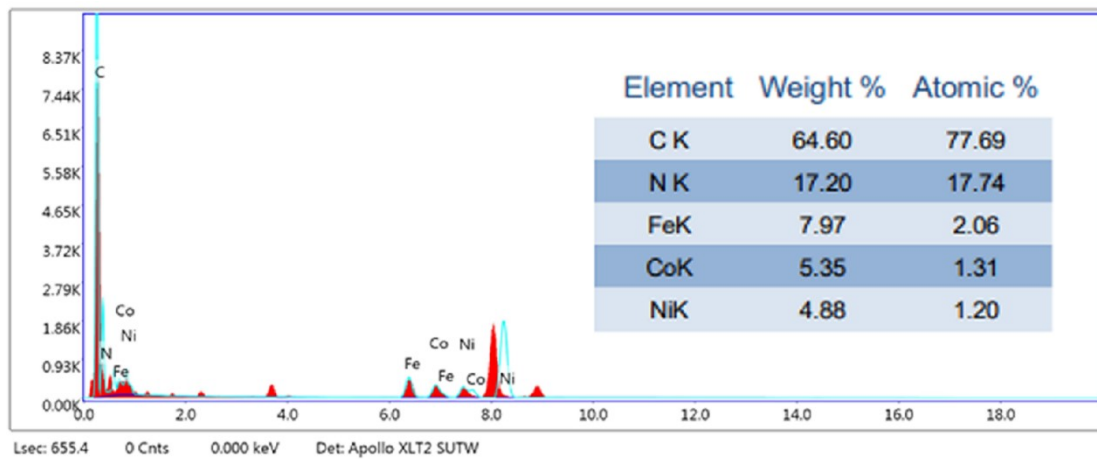

**Figure S2** the elemental components of FeCoNi-NC.

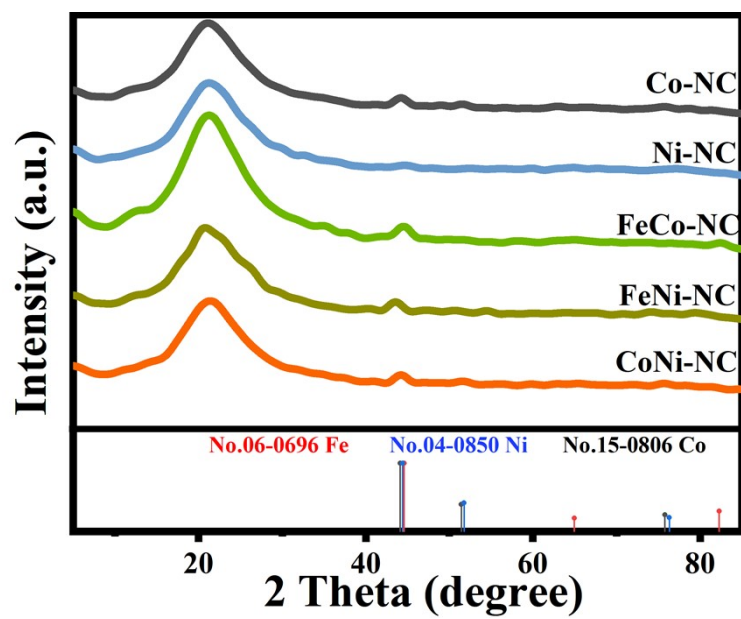

Figure S3 XRD pattern of various samples.

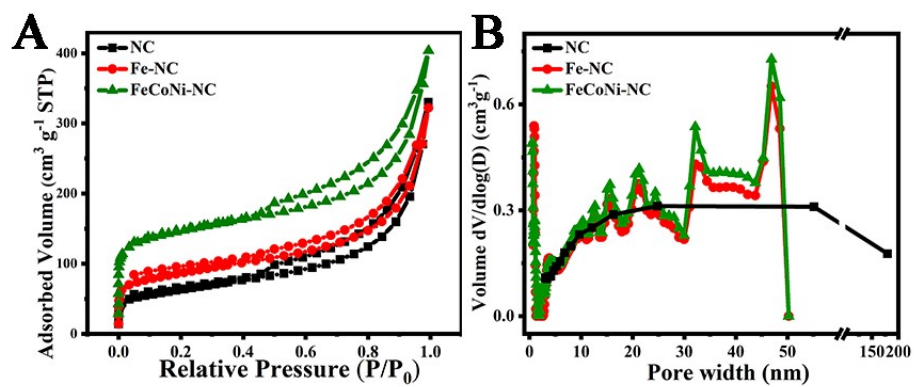

**Figure S4** (A) N<sub>2</sub> adsorption-desorption isotherms, and (B) the corresponding pore size distributions of NC, Fe-NC and FeCoNi-NC.

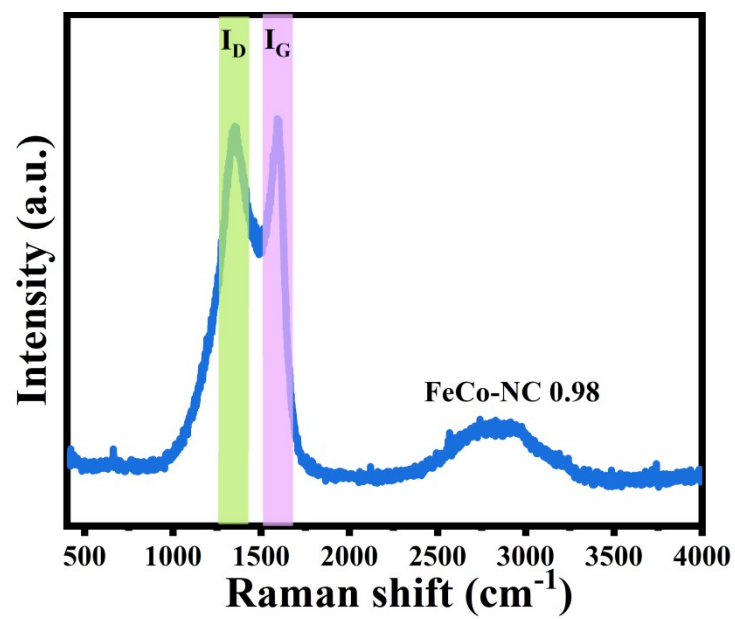

Figure S5 Raman spectrum of FeCo-NC.

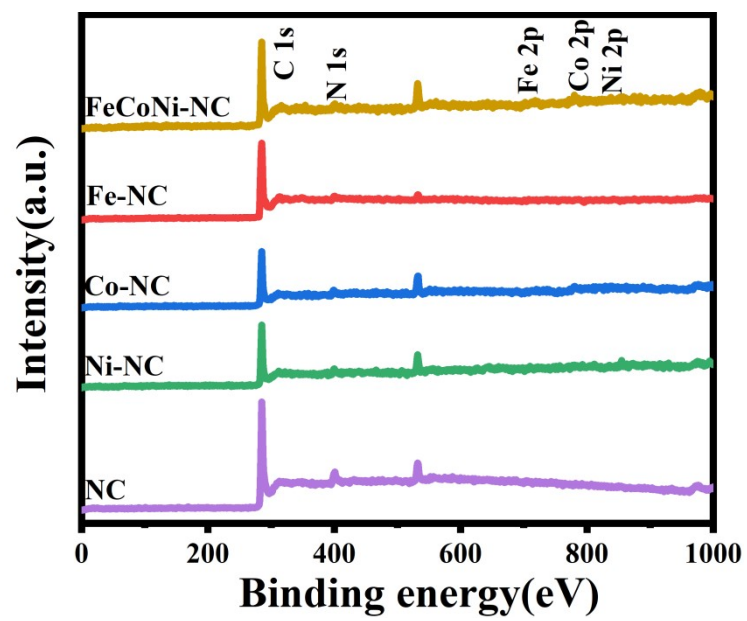

Figure S6 XPS survey spectra of various samples.



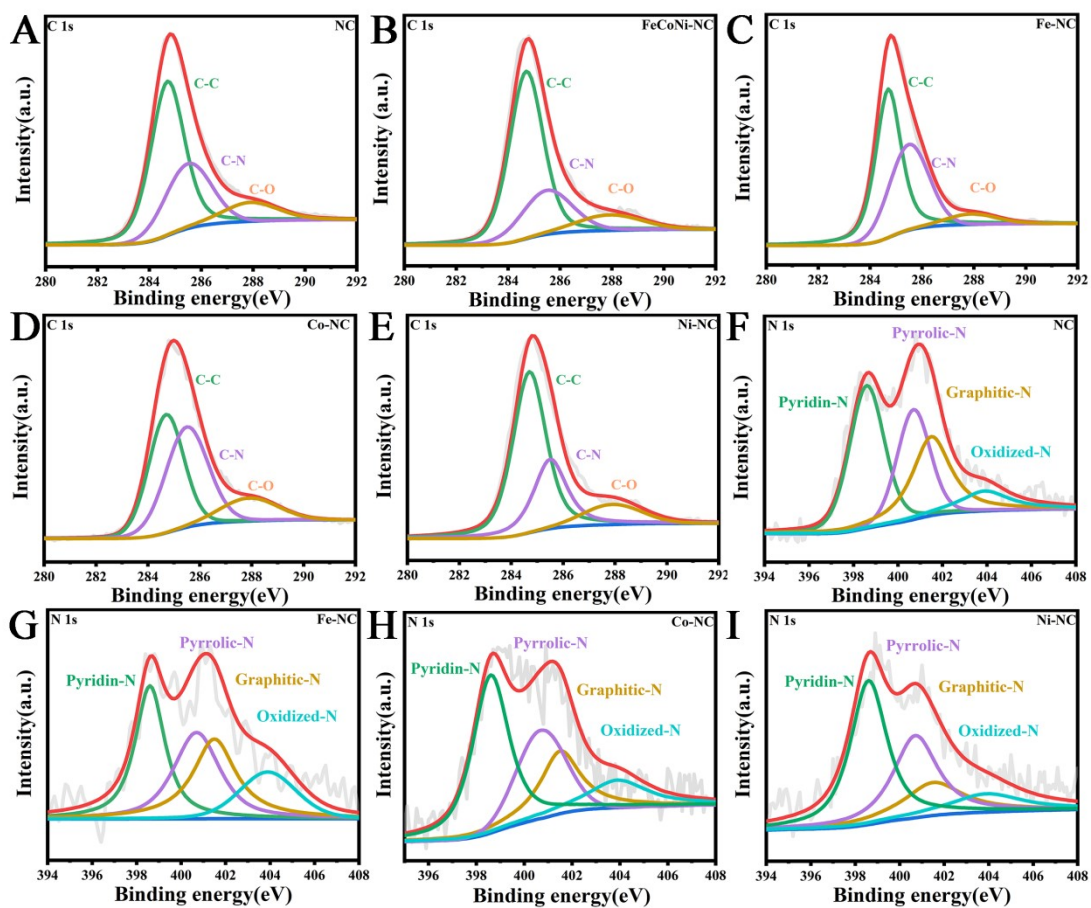

Figure S7 (A-E) C 1s, (F-I) N 1s of various samples.

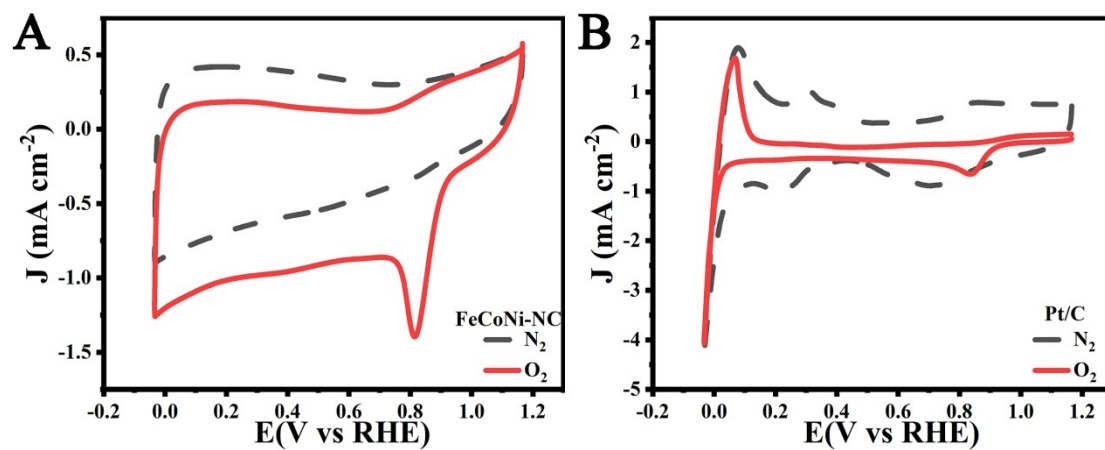

**Figure S8** CV curves of FeCoNi-NC and Pt/C in O<sub>2</sub>-saturated and N<sub>2</sub>-saturated 0.1 M KOH.

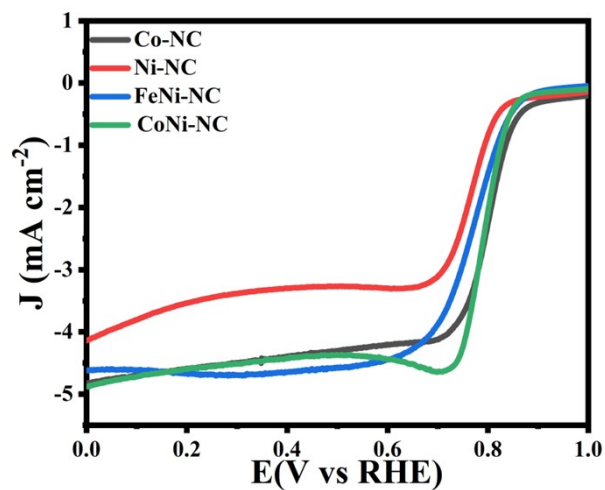

**Figure S9** ORR LSV curves of various samples at 1600 rpm in O<sub>2</sub>-saturated 0.1 M KOH.

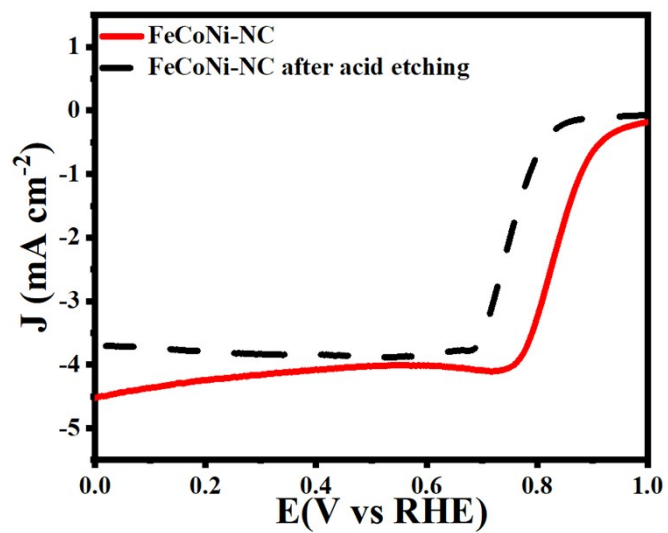

Figure S10 LSV curves of FeCoNi-NC before and after acid etching.

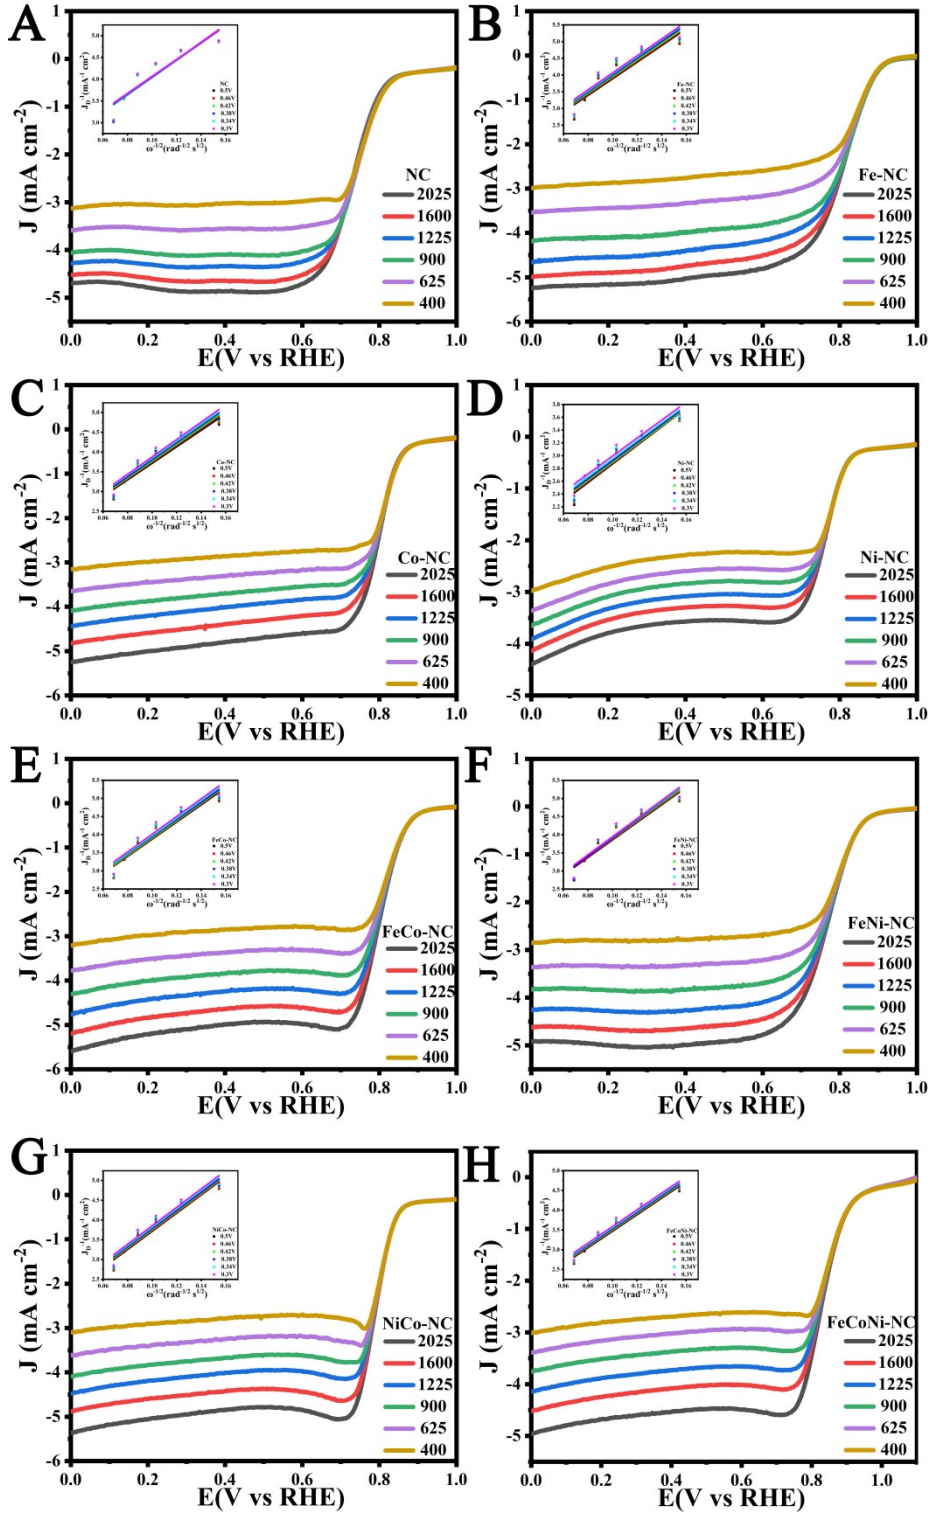

Figure S11 LSV curves with the sweep rate from to 400 to 2025 rpm and the corresponding K-L plots of various samples.

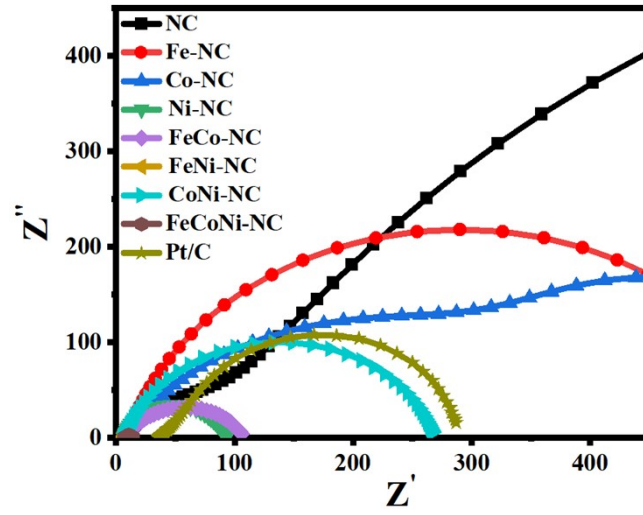

Figure S12 Nyquist plots of various samples in 0.1 M KOH.

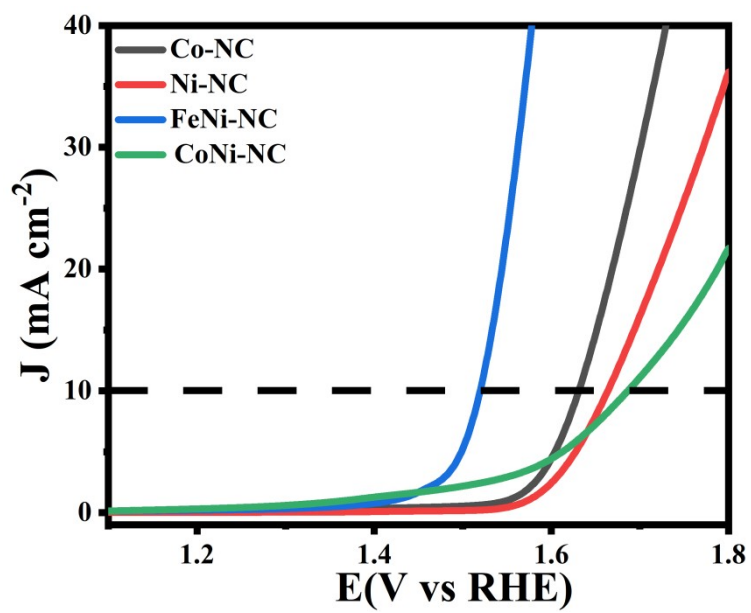

Figure S13 OER LSV curves in 1 M KOH of various samples.

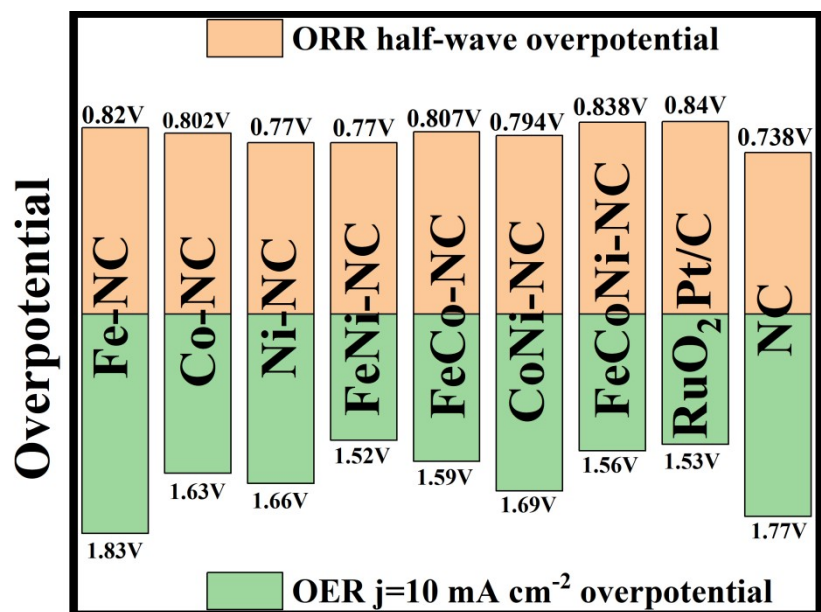

Figure S14 ORR half wave overpotential ( $E_{1/2}$ ) and OER overpotential at  $10 \text{ mA cm}^{-2}$ .



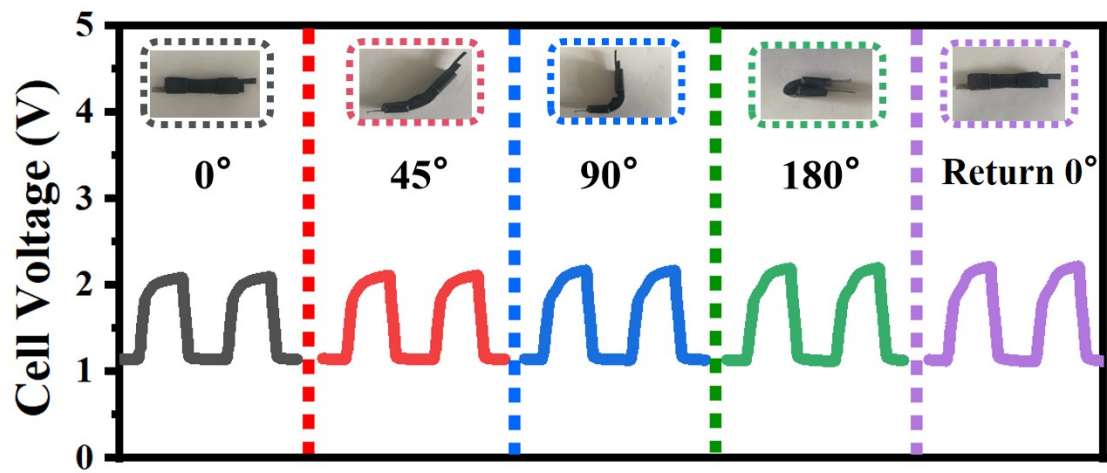

**Figure S15** Discharge-charge cycling measurement of FeCoNi-NC-based f-ZABs under bending state (the inset show the images of FeCoNi-NC-based f-ZABs with different bending angles).

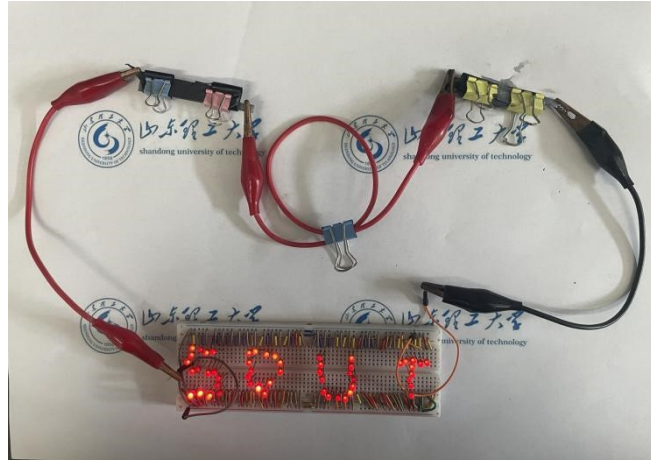

**Figure S16** The image of red LEDs powered by FeCoNi-NC-based f-ZABs.

**Table S1** Experimental details for as-prepared samples.

| <b>Sample</b> | <b>FeCl<sub>3</sub>·6H<sub>2</sub>O</b> | <b>Co(CH<sub>3</sub>COO)<sub>2</sub></b> | <b>Ni(CH<sub>3</sub>COO)<sub>2</sub></b> |
|---------------|-----------------------------------------|------------------------------------------|------------------------------------------|
| NC            | 0 mg                                    | 0 mg                                     | 0 mg                                     |
| Fe-NC         | 50 mg                                   | 0 mg                                     | 0 mg                                     |
| Co-NC         | 0 mg                                    | 25 mg                                    | 0 mg                                     |
| Ni-NC         | 0 mg                                    | 0 mg                                     | 50 mg                                    |
| FeCo-NC       | 50 mg                                   | 50 mg                                    | 0 mg                                     |
| FeNi-NC       | 50 mg                                   | 0 mg                                     | 50 mg                                    |
| CoNi-NC       | 0 mg                                    | 50 mg                                    | 50 mg                                    |
| FeCoNi-NC     | 50 mg                                   | 25 mg                                    | 25 mg                                    |

**Table S2** The elemental components of as-prepared samples.

| <b>Sample</b>    | <b>C (at%)</b> | <b>N (at%)</b> | <b>Fe (at%)</b> | <b>Co(at%)</b> | <b>Ni (at%)</b> |
|------------------|----------------|----------------|-----------------|----------------|-----------------|
| <b>FeCoNi-NC</b> | <b>89.94</b>   | <b>6.38</b>    | <b>1.17</b>     | <b>1.31</b>    | <b>1.20</b>     |
| Fe-NC            | 90.17          | 8.43           | 1.41            | —              | —               |
| Co-NC            | 90.67          | 7.00           | —               | 2.33           | —               |
| Ni-NC            | 89.77          | 8.53           | —               | —              | 1.70            |
| NC               | 91.75          | 8.25           | —               | —              | —               |

**Table S3** Comparison of ORR and OER activity for FeCoNi-NC with other reported transition metal catalysts.

| Sample                                        | ORR $E_{1/2}$ (V) | OER overpotential (V) @ 10 mA cm <sup>-2</sup> | Reference                                             |
|-----------------------------------------------|-------------------|------------------------------------------------|-------------------------------------------------------|
| FeCoNi-NC                                     | 0.838             | 1.560                                          | This work                                             |
| FeNi/N-C-800                                  | 0.845             | 1.600                                          | Appl. Catal. B 2023, 321, 122067.                     |
| YHP-1                                         | 0.79              | 1.487                                          | Rare Metals 2023. doi.org/10.1007/s12598-023-02485-9. |
| Fe <sub>0.25</sub> Co <sub>0.75</sub> /NC-800 | 0.860             | —                                              | Adv. Sci. 2022, 9, 2200394.                           |
| NiFe/N-CNT                                    | 0.75              | 1.520                                          | Nano Energy, 2020, 68, 104293.                        |
| G-Co <sub>0.6</sub> Fe <sub>0.4</sub>         | 0.83              | —                                              | Adv. Energy Mater., 2020, 10, 1903215.                |
| FeCo/Co <sub>2</sub> P@NPCF                   | 0.79              | —                                              | Adv. Energy Mater., 2020, 10, 1903854.                |
| CoFe/N-GCT                                    | 0.79              | 1.670                                          | Angew. Chem. Int. Ed., 2018, 57, 16166-16170.         |
| CoNiFe-S MNs                                  | 0.78              | 1.490                                          | Adv. Energy Mater., 2018, 8, 1801839.                 |
